# Supplementary material for: Evaluation of Federal Policy Changes to the Hospice Benefit and Use of Hospice for Persons With ADRD
Source: PubMed Central journal article supplement (PMC9077487; doi:10.1001/jamahealthforum.2022.0900), 2022-05-06
Supplement: jamahealthforum-e220900-s001.pdf [file jamahealthforum-e220900-s001.pdf]

## Supplemental Online Content

Gianattasio KZ, Moghtaderi A, Lupu D, Prather C, Power MC. Evaluation of federal policy changes to the hospice benefit and use of hospice for persons with ADRD. *JAMA Health Forum*. 2022;3(5):e220900.  
doi:10.1001/jamahealthforum.2022.0900

**eAppendix 1.** Detailed model specification

**eAppendix 2.** Detailed summary of sensitivity analyses

**eTable 1.** Number and percent of hospice episode exclusions

**eTable 2.** Characteristics of hospice episodes before and after exclusions

**eTable 3.** List of ICD-9 and ICD-10 codes used to identify ADRD

**eTable 4.** Summary of time-varying hospice-level and county-level covariates

**eTable 5.** Summary of hospice characteristics

**eTable 6.** Differences in the trajectories of percent new monthly enrollees with ADRD, percent monthly patient census with ADRD, and percent care days provided to patients with ADRD coinciding with recent policy changes affecting the Medicare hospice benefit, estimated by fully adjusted models, using alternate ADRD identification and unique hospice episode identification strategies

**eTable 7.** Differences in the trajectories of percent new monthly enrollees with ADRD, percent monthly patient census with ADRD, and percent care days provided to patients with ADRD coinciding with recent policy changes affecting the Medicare hospice benefit, estimated by fully adjusted models using different subsamples of the data

**eTable 8.** Differences in the trajectories of percent new monthly enrollees with ADRD, percent monthly patient census with ADRD, and percent care days provided to patients with ADRD coinciding with recent policy changes affecting the Medicare hospice benefit, estimated by fully adjusted models, within hospices with low baseline proportion of institutionalized patients, and hospice with high baseline proportion of institutionalized patients

**eReferences**

This supplemental material has been provided by the authors to give readers additional information about their work.

## eAppendix 1. Detailed model specification

We considered the trends in each of our three outcomes over time, in relation to the FTT/debility exclusion notice published in May 2013 (to account for code-shifting towards increased use of ADRD codes), the passage/implementation of the IMPACT ACT in September/October 2014, and implementation of the two-tier payment system in January 2016.

We modelled trends in each outcome as parametrized below:

$$Y_{ict} = \beta_0 + \beta_1 t_{pp_t} + \beta_2 FTT_t + \beta_3 t_{FTT_t} + \beta_4 IMPpass_t + \beta_5 IMPimp_t + \beta_6 t_{IMPimp_t} + \beta_7 newPay_t + \beta_8 t_{newPay_t} + \gamma + \delta(H_{it}) + \vartheta(C_{ct}) + \alpha_i + \varepsilon_{ict} \quad [1]$$

where  $i$  indexes hospice,  $c$  indexes county,  $t$  indexes time in months, and  $Y$  is the outcome of interest. We used linear splines to model the linear trend in our outcome over the four distinct time periods demarcated by FTT/debility exclusion notice, IMPACT Act passage/implementation, and two-tier payment implementation:  $t_{pp}$  for the pre-FTT/debility exclusion notice time period,  $t_{FTT}$  for the post-FTT/debility exclusion notice period,  $t_{IMPimp}$  for the post-IMPACT ACT period, and  $t_{newPay}$  for the post-two-tier payment system implementation period. We also included indicator terms to allow for and estimate immediate changes in our outcomes at the time of the FTT/debility exclusion notice, passage of the IMPACT Act, implementation of the IMPACT Act, and implementation of the two-tier payment system:  $FTT$ ,  $IMPpass$ ,  $IMPimp$ , and  $newPay$ . We adjusted for several covariates:  $\gamma$  represents month fixed-effects to account for seasonality, and  $H$  and  $C$  represent time-varying hospice- and county-level characteristics (**Appendix Table 4**). Finally, to estimate within-hospice variations across time, we included hospice fixed-effects ( $\alpha$ ).<sup>31</sup>

## **eAppendix 2.** Detailed summary of sensitivity analyses

First, because ADRD patients often have other contributing comorbidities, we repeated the analyses by classifying as ADRD patients all those with ADRD coded in (i) the principal, second, or third diagnoses codes, and (ii) the principal, second, third, or fourth diagnoses codes. Second, for purposes of determining payment rate under the new two-tier payment system, re-enrollments within 60 days after a discharge are considered as a continuation of the prior episode of care. Thus, we used an alternative strategy to identify new enrollments, which requires any re-enrollment following a prior discharge or break in claims to occur at least 60 days apart, and repeated our analysis of trends in percent new enrollees with ADRD. Third, we repeated our analyses for all outcomes excluding data from government-owned hospices (4.4% of all hospices), which may operate fundamentally differently from privately-owned non-profit hospices. Similarly, as beneficiaries covered by Medicare Advantage (MA) may experience different terminal care and hospice referral practices to those covered by traditional fee for service (FFS) Medicare, we repeated our analyses for all outcomes excluding beneficiaries with any MA coverage (accounting for 30.9% of all episodes). Fifth, to eliminate the influence of hospices that newly open or shut down during the analytical period (July 2008 – December 2019), we repeated our analyses limiting to hospices providing care throughout the observation period. Sixth, given that 2008-2009 claims only contain date of service quarter indicators rather than specific dates (which we converted to month indicators used in our primary analyses by random number generation), we repeated our analyses excluding data for hospice episodes that began prior to 2010. Finally, because scrutiny has historically been especially pronounced around long-stay patients that receive hospice care in institutionalized settings (e.g. long-term care facilities, skilled nursing facilities), we explored potential differences in policy effects between hospices with low vs. high baseline proportion of care provided to patients in institutionalized settings. Specifically, we defined the baseline period as July 2008 – April 2013, and excluded hospices that entered the market within two years of the end of this period (i.e. after April 2011). We then identified hospices with low proportion of institutionalized patients as those that had lower than median percentage (38%) of care provided to patients in institutionalized settings in at least 90% of months during the baseline period. Conversely, hospices with high baseline proportion institutionalized care were those that provided higher than the median percentage (38%) of care to institutionalized patients in at least 90% of months during the baseline period.

**eTable 1.** Number and percent of hospice episode exclusions

| Year    | Total      | Exclusions, N(%)                 |                                 |                                  |                          |                                         |                                                    | Remaining in sample, N(%) |
|---------|------------|----------------------------------|---------------------------------|----------------------------------|--------------------------|-----------------------------------------|----------------------------------------------------|---------------------------|
|         |            | Missing hospice-level covariates | Missing county-level covariates | Missing demographics or age < 65 | Claim date discrepancies | Claim date and death date discrepancies | Claims with out-of-range claim dates or claim days |                           |
| Overall | 13,812,688 | 1,453,842 (10.5%)                | 132,411 (1.0%)                  | 801,101 (5.8%)                   | 34,595 (0.3%)            | 59,246 (0.4%)                           | 206,571 (1.5%)                                     | 11,124,922 (80.5%)        |
| 2008    | 468,799    | 35,602 (7.6%)                    | 7,096 (1.5%)                    | 29,597 (6.3%)                    | 172 (0%)                 | 2,005 (0.4%)                            | 11,179 (2.4%)                                      | 383,148 (81.7%)           |
| 2009    | 984,837    | 79,964 (8.1%)                    | 10,886 (1.1%)                   | 58,455 (5.9%)                    | 411 (0%)                 | 4,536 (0.5%)                            | 28,484 (2.9%)                                      | 802,101 (81.4%)           |
| 2010    | 1,040,677  | 94,714 (9.1%)                    | 12,804 (1.2%)                   | 60,822 (5.8%)                    | 1,748 (0.2%)             | 11,353 (1.1%)                           | 19,330 (1.9%)                                      | 839,906 (80.7%)           |
| 2011    | 1,092,856  | 109,024 (10%)                    | 12,957 (1.2%)                   | 64,915 (5.9%)                    | 1,736 (0.2%)             | 10,969 (1%)                             | 19,935 (1.8%)                                      | 873,320 (79.9%)           |
| 2012    | 1,137,921  | 119,388 (10.5%)                  | 13,833 (1.2%)                   | 69,498 (6.1%)                    | 1,837 (0.2%)             | 6,855 (0.6%)                            | 16,875 (1.5%)                                      | 909,635 (79.9%)           |
| 2013    | 1,177,293  | 126,300 (10.7%)                  | 13,938 (1.2%)                   | 71,397 (6.1%)                    | 1,868 (0.2%)             | 3,450 (0.3%)                            | 15,595 (1.3%)                                      | 944,745 (80.2%)           |
| 2014    | 1,189,571  | 134,157 (11.3%)                  | 14,264 (1.2%)                   | 71,056 (6.0%)                    | 2,506 (0.2%)             | 3,230 (0.3%)                            | 14,776 (1.2%)                                      | 949,582 (79.8%)           |
| 2015    | 1,251,076  | 150,616 (12%)                    | 14,283 (1.1%)                   | 72,381 (5.8%)                    | 3,034 (0.2%)             | 3,342 (0.3%)                            | 15,416 (1.2%)                                      | 992,004 (79.3%)           |
| 2016    | 1,288,323  | 144,446 (11.2%)                  | 8,178 (0.6%)                    | 73,298 (5.7%)                    | 6,465 (0.5%)             | 5,334 (0.4%)                            | 16,617 (1.3%)                                      | 1,033,985 (80.3%)         |
| 2017    | 1,345,534  | 137,588 (10.2%)                  | 7,611 (0.6%)                    | 75,933 (5.6%)                    | 3,477 (0.3%)             | 4,453 (0.3%)                            | 16,773 (1.2%)                                      | 1,099,699 (81.7%)         |
| 2018    | 1,396,326  | 154,200 (11%)                    | 8,092 (0.6%)                    | 76,508 (5.5%)                    | 5,923 (0.4%)             | 2,001 (0.1%)                            | 17,044 (1.2%)                                      | 1,132,558 (81.1%)         |
| 2019    | 1,439,475  | 167,843 (11.7%)                  | 8,469 (0.6%)                    | 77,241 (5.4%)                    | 5,418 (0.4%)             | 1,718 (0.1%)                            | 14,547 (1.0%)                                      | 1,164,239 (80.9%)         |

**eTable 2.** Characteristics of hospice episodes before and after exclusions <sup>a</sup>

|                                      | All episodes | Exclude episodes missing hospice-covariates | Exclude missing county covariates | Exclude age < 65 or missing demographic | Exclude claim date and death date discrepancies | Exclude out-of-range claim dates or claim days (remaining claims) |
|--------------------------------------|--------------|---------------------------------------------|-----------------------------------|-----------------------------------------|-------------------------------------------------|-------------------------------------------------------------------|
| N                                    | 13,812,688   | 12,358,846                                  | 12,226,435                        | 11,425,334                              | 11,331,493                                      | 11,124,922                                                        |
| Patient age at enrollment, mean (SD) | 81 (10.5)    | 81 (10.5)                                   | 81 (10.5)                         | 82.7 (8.5)                              | 82.7 (8.5)                                      | 82.7 (8.5)                                                        |
| Male patients, %                     | 42.50%       | 42.40%                                      | 42.40%                            | 41.60%                                  | 41.60%                                          | 41.70%                                                            |
| Patient race/ethnicity               |              |                                             |                                   |                                         |                                                 |                                                                   |
| White, %                             | 86.70%       | 86.50%                                      | 86.80%                            | 87.50%                                  | 87.50%                                          | 87.50%                                                            |
| Black, %                             | 8.50%        | 8.50%                                       | 8.50%                             | 8.00%                                   | 8.00%                                           | 7.90%                                                             |
| Hispanic, %                          | 2.00%        | 2.10%                                       | 1.80%                             | 1.80%                                   | 1.80%                                           | 1.80%                                                             |
| Other, %                             | 2.80%        | 2.90%                                       | 2.80%                             | 2.80%                                   | 2.80%                                           | 2.80%                                                             |
| Patient had any MA coverage, %       | 30.90%       | 30.90%                                      | 30.60%                            | 30.90%                                  | 30.90%                                          | 30.90%                                                            |
| Patient with ADRD, %                 | 20.50%       | 20.50%                                      | 20.40%                            | 21.50%                                  | 21.50%                                          | 21.40%                                                            |
| Region                               |              |                                             |                                   |                                         |                                                 |                                                                   |
| Northeast, %                         | 15.60%       | 15.60%                                      | 15.70%                            | 15.90%                                  | 15.90%                                          | 16.00%                                                            |
| West, %                              | 20.10%       | 20.00%                                      | 20.10%                            | 20.40%                                  | 20.40%                                          | 20.30%                                                            |
| South, %                             | 40.60%       | 40.70%                                      | 40.50%                            | 40.00%                                  | 40.00%                                          | 39.80%                                                            |
| Midwest, %                           | 23.70%       | 23.60%                                      | 23.70%                            | 23.80%                                  | 23.80%                                          | 23.90%                                                            |
| Rurality                             |              |                                             |                                   |                                         |                                                 |                                                                   |
| Large metro, %                       | 88.50%       | 88.50%                                      | 88.40%                            | 88.60%                                  | 88.60%                                          | 88.60%                                                            |
| Urban, adjacent to metro, %          | 6.90%        | 6.90%                                       | 6.90%                             | 6.90%                                   | 6.90%                                           | 6.90%                                                             |
| Urban, nonadjacent to metro, %       | 4.20%        | 4.20%                                       | 4.20%                             | 4.10%                                   | 4.10%                                           | 4.10%                                                             |
| Rural, %                             | 0.40%        | 0.40%                                       | 0.40%                             | 0.40%                                   | 0.40%                                           | 0.40%                                                             |
| Hospice ownership                    |              |                                             |                                   |                                         |                                                 |                                                                   |
| For-profit, %                        | 49.80%       | 49.70%                                      | 49.70%                            | 49.60%                                  | 49.60%                                          | 49.30%                                                            |
| Non-profit, %                        | 48.40%       | 48.40%                                      | 48.40%                            | 48.50%                                  | 48.50%                                          | 48.80%                                                            |
| Government-owned, %                  | 1.90%        | 1.90%                                       | 1.90%                             | 1.90%                                   | 1.90%                                           | 1.90%                                                             |
| Freestanding, %                      | 79.10%       | 79.20%                                      | 79.10%                            | 79.10%                                  | 79.10%                                          | 79.00%                                                            |

Abbreviations: ADRD = Alzheimer's Disease and Related Dementias; MA = Medicare Advantage; SD = standard deviation

<sup>a</sup>Exclusions are cumulative across columns.

**eTable 3.** List of ICD-9 and ICD-10 codes used to identify ADRD

This list was constructed by expanding on a previously validated set of ICD-9 indicating ADRD prior to the ICD-9/ICD-10 shift,<sup>1</sup> and identifying their ICD-10 equivalents for use in claims after September 2015

| ICD-9  |                                                                     | ICD-10 |                                                           |
|--------|---------------------------------------------------------------------|--------|-----------------------------------------------------------|
| Code   | Description                                                         | Code   | Description                                               |
| 331.0  | Alzheimer's disease                                                 | G30.9  | Alzheimer's disease, unspecified                          |
|        |                                                                     | G30.0  | Alzheimer's disease with early onset                      |
|        |                                                                     | G30.1  | Alzheimer's disease with late onset                       |
|        |                                                                     | G30.8  | Other Alzheimer's disease                                 |
| 331.1  | Frontotemporal dementia                                             | G31.0  |                                                           |
| 331.11 | Pick's disease                                                      | G31.01 | Pick's disease                                            |
| 331.19 | Other frontotemporal dementia                                       | G31.09 | Other frontotemporal dementia                             |
| 331.2  | Senile degeneration of the brain                                    | G31.1  | Senile degeneration of brain, not elsewhere classified    |
| 331.7  | Cerebral degeneration in diseases classified elsewhere              | G94    | Other disorders of brain in diseases classified elsewhere |
| 331.82 | Dementia with Lewy bodies                                           | G31.83 | Dementia with Lewy bodies                                 |
| 290.0  | Senile dementia, uncomplicated                                      | F03.90 | Unspecified dementia, without behavioral disturbance      |
| 290.1  | Presenile dementia (brain syndrome with presenile dementia)         |        |                                                           |
| 290.10 | Presenile dementia, uncomplicated                                   |        |                                                           |
| 290.11 | Presenile dementia, with delirium                                   |        |                                                           |
| 290.12 | Presenile dementia, with delusional features                        |        |                                                           |
| 290.13 | Presenile dementia, with depressive features                        |        |                                                           |
| 290.20 | Senile dementia, with delusional features                           |        |                                                           |
| 290.21 | Senile dementia, with depressive features                           |        |                                                           |
| 290.3  | Senile dementia, with delirium                                      |        |                                                           |
| 290.40 | Arteriosclerotic dementia, uncomplicated                            | F01.50 | Vascular dementia, without behavioral disturbance         |
| 290.41 | Arteriosclerotic dementia, with delirium                            | F01.51 | Vascular dementia, with behavioral disturbance            |
| 290.42 | Arteriosclerotic dementia, with delusional features                 |        |                                                           |
| 290.43 | Arteriosclerotic dementia, with depressive features                 |        |                                                           |
| 290.8  | Other specified senile psychotic conditions                         | F03.90 | Unspecified dementia without behavioral disturbance       |
| 290.9  | Unspecified senile psychotic condition                              |        |                                                           |
| 294.0  | Amnestic syndrome (Korsakoff's psychosis or syndrome, nonalcoholic) | F04    | Amnestic disorder due to known physiological condition    |
| 294.1  | Dementia in conditions classified elsewhere                         |        |                                                           |

|        |                                                                             |        |                                                                                 |
|--------|-----------------------------------------------------------------------------|--------|---------------------------------------------------------------------------------|
| 294.10 | Dementia in conditions classified elsewhere, without behavioral disturbance | F02.80 | Dementia in other diseases classified elsewhere, without behavioral disturbance |
| 294.11 | Dementia in conditions classified elsewhere, with behavioral disturbance    | F02.81 | Dementia in other diseases classified elsewhere, with behavioral disturbance    |
| 294.2  | Dementia, unspecified                                                       |        |                                                                                 |
| 294.20 | Dementia, unspecified, without behavioral disturbance                       | F03.90 | Unspecified dementia, without behavioral disturbance                            |
| 294.21 | Dementia, unspecified, with behavioral disturbance                          | F03.91 | Unspecified dementia, with behavioral disturbance                               |
| 294.8  | Other persistent mental disorders due to conditions classified elsewhere    | F06.0  | Psychotic disorder with hallucinations due to known physiological condition     |
|        |                                                                             | F06.8  | Other specified mental disorders due to known physiological condition           |
| 797    | Senility without mention of psychosis                                       | R41.81 | Age-related cognitive decline                                                   |

**eTable 4.** Summary of time-varying hospice-level and county-level covariates

| <b>Time-varying hospice-level covariates</b>                                                 |                                                                                                                                                                                                                                                                                                                                                                                                                                                                                     |
|----------------------------------------------------------------------------------------------|-------------------------------------------------------------------------------------------------------------------------------------------------------------------------------------------------------------------------------------------------------------------------------------------------------------------------------------------------------------------------------------------------------------------------------------------------------------------------------------|
| Hospice profit status                                                                        | Binary variable: 0=non-profit/government-owned; 1=for-profit                                                                                                                                                                                                                                                                                                                                                                                                                        |
| Hospice affiliation                                                                          | Binary variable: 0=affiliated with another entity; 1=freestanding                                                                                                                                                                                                                                                                                                                                                                                                                   |
| Number of full-time equivalent registered nurses employed by the hospice each year           | Continuous variable: logarithm                                                                                                                                                                                                                                                                                                                                                                                                                                                      |
| Number of full-time equivalent employees employed by the hospice each year                   | Continuous variable: logarithm                                                                                                                                                                                                                                                                                                                                                                                                                                                      |
| Average age of patients newly enrolled each month                                            | Continuous variable                                                                                                                                                                                                                                                                                                                                                                                                                                                                 |
| Percent of newly enrolled patients each month who are white                                  | Continuous variable                                                                                                                                                                                                                                                                                                                                                                                                                                                                 |
| Percent of newly enrolled patients each month who are Black                                  | Continuous variable                                                                                                                                                                                                                                                                                                                                                                                                                                                                 |
| Percent of newly enrolled patients each month who are Hispanic                               | Continuous variable                                                                                                                                                                                                                                                                                                                                                                                                                                                                 |
| Percent of newly enrolled patients each month who are male                                   | Continuous variable                                                                                                                                                                                                                                                                                                                                                                                                                                                                 |
| Percent of care days provided each month at the routine home care level                      | Continuous variable                                                                                                                                                                                                                                                                                                                                                                                                                                                                 |
| Percent of care days provided each month at the continuous home care level                   | Continuous variable                                                                                                                                                                                                                                                                                                                                                                                                                                                                 |
| Percent of care days provided to patients in a home setting                                  | Continuous variable                                                                                                                                                                                                                                                                                                                                                                                                                                                                 |
| Percent of care days provided to patients in a non-skilled long-term care setting            | Continuous variable                                                                                                                                                                                                                                                                                                                                                                                                                                                                 |
| Percent of care days provided to patients in a skilled nursing facility or inpatient setting | Continuous variable                                                                                                                                                                                                                                                                                                                                                                                                                                                                 |
| <b>Time-Varying county-level covariates</b>                                                  |                                                                                                                                                                                                                                                                                                                                                                                                                                                                                     |
| Total population                                                                             | Continuous variable: logarithm                                                                                                                                                                                                                                                                                                                                                                                                                                                      |
| Percent of population aged 65+                                                               | Continuous variable                                                                                                                                                                                                                                                                                                                                                                                                                                                                 |
| Percent of population aged 85+                                                               | Continuous variable                                                                                                                                                                                                                                                                                                                                                                                                                                                                 |
| Percent of population male                                                                   | Continuous variable                                                                                                                                                                                                                                                                                                                                                                                                                                                                 |
| Percent of population of white race                                                          | Continuous variable                                                                                                                                                                                                                                                                                                                                                                                                                                                                 |
| Percent of population of Black race                                                          | Continuous variable                                                                                                                                                                                                                                                                                                                                                                                                                                                                 |
| Percent of population of Hispanic ethnicity                                                  | Continuous variable                                                                                                                                                                                                                                                                                                                                                                                                                                                                 |
| Total number of non-federal active physicians (MDs)                                          | Continuous variable: logarithm                                                                                                                                                                                                                                                                                                                                                                                                                                                      |
| Percent of population below poverty line                                                     | Continuous variable                                                                                                                                                                                                                                                                                                                                                                                                                                                                 |
| Household median income                                                                      | Continuous variable: logarithm                                                                                                                                                                                                                                                                                                                                                                                                                                                      |
| Rural-urban continuum code                                                                   | Categorical variable:<br>1: Metropolitan, pop >= 1 mn<br>2: Metropolitan, 250k <= pop < 1 mn<br>3: Metropolitan, pop < 250k<br>4: Urban, pop >= 20k, adjacent to metropolitan<br>5: Urban, pop >= 20k, NOT adjacent to metropolitan<br>6: Urban, 2.5k <= pop < 20k, adjacent to metropolitan<br>7: Urban, 2.5k <= pop < 20k, NOT adjacent to metropolitan<br>8: Rural OR population < 2.5k, adjacent to metropolitan<br>9: Rural OR population < 2.5k, NOT adjacent to metropolitan |



**eTable 5.** Summary of hospice characteristics

|                                      | 2008             | 2009               | 2010               | 2011               | 2012               | 2013             | 2014               | 2015               | 2016             | 2017             | 2018               | 2019               |
|--------------------------------------|------------------|--------------------|--------------------|--------------------|--------------------|------------------|--------------------|--------------------|------------------|------------------|--------------------|--------------------|
| N                                    | 2,984            | 3,027              | 3,097              | 3,161              | 3,272              | 3,420            | 3,585              | 3,655              | 3,824            | 3,992            | 4,127              | 4,303              |
| Monthly patient census               | 62.5<br>(103.1)  | 72.8<br>(140.2)    | 78.5<br>(154.6)    | 80.5<br>(159.8)    | 83.3<br>(163.4)    | 82<br>(159.5)    | 78.4<br>(159.5)    | 79.7<br>(169.9)    | 80.8<br>(182.2)  | 82.7<br>(188.9)  | 84.4<br>(200.5)    | 85.7<br>(213.3)    |
| Monthly number of care days provided | 1303<br>(2161.4) | 1578.4<br>(3138.3) | 1718.5<br>(3511.7) | 1777.1<br>(3656.2) | 1858.5<br>(3761.1) | 1815<br>(3646.3) | 1732.5<br>(3653.7) | 1760.6<br>(3926.4) | 1799.6<br>(4280) | 1839.4<br>(4439) | 1893.6<br>(4753.9) | 1944.3<br>(5090.7) |
| RN FTE, mean (SD)                    | 8.8<br>(17.5)    | 9.3<br>(19.3)      | 9.7<br>(19.9)      | 10<br>(19.9)       | 10.2<br>(20.6)     | 10.4<br>(20.5)   | 10.3<br>(20.1)     | 10.6<br>(20.4)     | 10.5<br>(20.9)   | 10.4<br>(20.5)   | 10.3<br>(21.4)     | 10.1<br>(20.2)     |
| MD FTE, mean (SD)                    | 1.1 (2.6)        | 1.1 (2.6)          | 1.2 (2.6)          | 1.2 (2.7)          | 1.5<br>(11.2)      | 1.5<br>(11.3)    | 1.4 (11)           | 1.4<br>(10.8)      | 1.4<br>(10.6)    | 1.2 (2.5)        | 1.1 (2.1)          | 1.1 (1.8)          |
| Total employees, mean (SD)           | 28.3<br>(61.3)   | 29.7<br>(63.7)     | 30.9<br>(65.6)     | 33.3<br>(90.9)     | 34.1<br>(92.7)     | 34.3<br>(89.5)   | 34.2<br>(89)       | 33.4<br>(66.4)     | 33.3<br>(69.3)   | 32.4<br>(66.9)   | 31.7<br>(66.7)     | 30.3<br>(62.2)     |
| <i>Level of care</i>                 |                  |                    |                    |                    |                    |                  |                    |                    |                  |                  |                    |                    |
| % RHC, mean (SD)                     | 98.2<br>(3.6)    | 98.2 (3)           | 97.7<br>(3.9)      | 97.7<br>(3.8)      | 98.2 (4)           | 98.5<br>(2.9)    | 98.5 (3)           | 98.6<br>(3.1)      | 98.6<br>(3.1)    | 98.7<br>(3.7)    | 98.8<br>(3.1)      | 98.9<br>(3.1)      |
| % CHC, mean (SD)                     | 0.1 (0.5)        | 0.2 (1.1)          | 0.2 (0.7)          | 0.2 (0.9)          | 0.2 (1.1)          | 0.2 (0.9)        | 0.2 (1)            | 0.2 (0.9)          | 0.2 (1.2)        | 0.2 (2.1)        | 0.2 (1.2)          | 0.2 (1.3)          |
| % inpatient, mean (SD)               | 1.3 (3.4)        | 1.3 (2.7)          | 1.3 (2.7)          | 1.3 (2.8)          | 1.2 (3.7)          | 1.1 (2.6)        | 1 (2.7)            | 1 (2.8)            | 0.9 (2.7)        | 0.8 (2.9)        | 0.7 (2.7)          | 0.7 (2.6)          |
| % respite, mean (SD)                 | 0.2 (0.4)        | 0.2 (0.3)          | 0.2 (0.4)          | 0.3 (0.4)          | 0.3 (0.4)          | 0.3 (0.5)        | 0.3 (0.4)          | 0.3 (0.4)          | 0.3 (0.5)        | 0.3 (0.5)        | 0.3 (0.9)          | 0.3 (0.5)          |
| <i>Place of care</i>                 |                  |                    |                    |                    |                    |                  |                    |                    |                  |                  |                    |                    |
| % home, mean (SD)                    | 61.6<br>(26.5)   | 62.1<br>(26.5)     | 61.4<br>(26.6)     | 61.8<br>(26)       | 62.2<br>(26.1)     | 62.3<br>(26.1)   | 62.7<br>(25.8)     | 62.4<br>(25.8)     | 62.3<br>(26.3)   | 62.1<br>(26.1)   | 62.2<br>(26.3)     | 62.4<br>(26.7)     |
| % non-skilled LTC, mean (SD)         | 24.8<br>(24.8)   | 25<br>(24.7)       | 26.5<br>(24.9)     | 27<br>(25.1)       | 27.4<br>(25.3)     | 27.8<br>(25.2)   | 27.4<br>(24.8)     | 27.8<br>(24.9)     | 28<br>(25.1)     | 28.9<br>(25.1)   | 29.3<br>(25.4)     | 29.4<br>(25.6)     |
| % SNF or inpatient, mean (SD)        | 12.8<br>(19.4)   | 12.3<br>(18.6)     | 10.8<br>(16.2)     | 9.5<br>(15.5)      | 9.3<br>(15.2)      | 9 (14.5)         | 8.8<br>(13.8)      | 8.6<br>(14.1)      | 8.6<br>(14.4)    | 7.9<br>(13.7)    | 7.6<br>(13.3)      | 7.4<br>(12.9)      |
| <i>Region</i>                        |                  |                    |                    |                    |                    |                  |                    |                    |                  |                  |                    |                    |
| Northeast, %                         | 13.30%           | 13.40%             | 13.30%             | 13.30%             | 13.00%             | 12.40%           | 11.70%             | 11.30%             | 10.70%           | 10.20%           | 9.70%              | 9.10%              |
| West, %                              | 18.80%           | 19.00%             | 20.00%             | 20.80%             | 21%                | 23.20%           | 25.10%             | 27.00%             | 29.10%           | 31.40%           | 33%                | 34.60%             |
| South, %                             | 42.70%           | 42.90%             | 42.60%             | 42.30%             | 42.10%             | 41.60%           | 41.00%             | 39.60%             | 38.50%           | 37.30%           | 36.90%             | 36.20%             |
| Midwest, %                           | 25.20%           | 25%                | 24.10%             | 23.70%             | 23.60%             | 22.90%           | 22%                | 22.10%             | 21.70%           | 21.10%           | 20.60%             | 20.10%             |
| <i>Rurality</i>                      |                  |                    |                    |                    |                    |                  |                    |                    |                  |                  |                    |                    |
| Large metro, %                       | 69%              | 69.60%             | 71.20%             | 72.10%             | 73.00%             | 76.20%           | 77.40%             | 78.40%             | 79.60%           | 80.60%           | 81.10%             | 82.20%             |
| Urban, metro adj., %                 | 15.70%           | 15.70%             | 15%                | 14.60%             | 14.20%             | 12.60%           | 12%                | 11.40%             | 10.90%           | 11%              | 10.20%             | 9%                 |
| Urban, non-metro adj., %             | 12.20%           | 12.20%             | 11.40%             | 11.10%             | 10.80%             | 9.70%            | 9.40%              | 9%                 | 8.30%            | 8%               | 8%                 | 8%                 |

|                          |        |        |        |        |        |        |        |        |        |        |        |        |
|--------------------------|--------|--------|--------|--------|--------|--------|--------|--------|--------|--------|--------|--------|
| Rural, %                 | 2.80%  | 2.50%  | 2.40%  | 2.20%  | 2.00%  | 1.50%  | 1.50%  | 1.30%  | 1.20%  | 1.10%  | 1%     | 0.90%  |
| <i>Hospice ownership</i> |        |        |        |        |        |        |        |        |        |        |        |        |
| For-profit, %            | 54.80% | 56.20% | 57.80% | 59.80% | 62%    | 64.60% | 67.00% | 68.80% | 70.00% | 71.00% | 73%    | 74.60% |
| Non-profit, %            | 39.10% | 38.10% | 36.60% | 34.90% | 33.00% | 31%    | 28.60% | 27.10% | 26.10% | 25.50% | 23.80% | 22.40% |
| Government, %            | 6.10%  | 5.70%  | 5.60%  | 5.30%  | 5.00%  | 4.70%  | 4.40%  | 4.10%  | 3.90%  | 3.50%  | 3.30%  | 3.00%  |
| Freestanding, %          | 64.60% | 66.60% | 68.60% | 70.40% | 72.60% | 74.90% | 77.10% | 79.40% | 80.70% | 82.60% | 83.50% | 84.50% |

Abbreviations: CHC = continuous home care; FTT = failure-to-thrive/debility; LTC = long-term care facility; MD = medical doctor; RHC = routine home care; RN = registered nurse; SD = standard deviation; SNF = skilled nursing home

**eTable 6.** Differences in the trajectories of percent new monthly enrollees with ADRD, percent monthly patient census with ADRD, and percent care days provided to patients with ADRD coinciding with recent policy changes affecting the Medicare hospice benefit, estimated by fully adjusted models,<sup>a</sup> using alternate ADRD identification and unique hospice episode identification strategies

|                                                                 | ADRD defined using principal and first two contributing diagnoses |         | ADRD defined using principal and first three contributing diagnoses |         | Alternate hospice episode identification strategy |         |
|-----------------------------------------------------------------|-------------------------------------------------------------------|---------|---------------------------------------------------------------------|---------|---------------------------------------------------|---------|
|                                                                 | Estimate (95% CI)                                                 | p-value | Estimate (95% CI)                                                   | p-value | Estimate (95% CI)                                 | p-value |
| <i>Percent new monthly enrollees with ADRD</i>                  |                                                                   |         |                                                                     |         |                                                   |         |
| Pre-FTT/debility exclusion slope <sup>b</sup>                   | 0.06 (0.05, 0.07)                                                 | <.001   | 0.06 (0.06, 0.07)                                                   | <.001   | 0.05 (0.04, 0.06)                                 | <.001   |
| Change during FTT/debility exclusion notice                     | 4.02 (3.64, 4.41)                                                 | <.001   | 4.22 (3.83, 4.61)                                                   | <.001   | 3.82 (3.44, 4.20)                                 | <.001   |
| Post-FTT/debility exclusion slope <sup>b</sup>                  | 0.09 (0.05, 0.13)                                                 | <.001   | 0.09 (0.05, 0.13)                                                   | <.001   | 0.09 (0.05, 0.12)                                 | <.001   |
| Change during IMPACT passage                                    | -1.28 (-2, -0.56)                                                 | <.001   | -1.22 (-1.96, -0.49)                                                | 0.001   | -1.37 (-2.10, -0.65)                              | <.001   |
| Change during IMPACT implementation                             | -2.14 (-2.88, -1.4)                                               | <.001   | -2.33 (-3.09, -1.58)                                                | <.001   | -2.05 (-2.79, -1.31)                              | <.001   |
| Post-IMPACT slope <sup>b</sup>                                  | 0.18 (0.14, 0.22)                                                 | <.001   | 0.25 (0.21, 0.29)                                                   | <.001   | 0.11 (0.07, 0.15)                                 | <.001   |
| Change during TTP implementation                                | 0.38 (0.01, 0.75)                                                 | 0.046   | 0.63 (0.26, 1.01)                                                   | 0.001   | 0.21 (-0.15, 0.58)                                | 0.248   |
| Post TTP-slope <sup>b</sup>                                     | 0.01 (0, 0.02)                                                    | 0.014   | 0.01 (0, 0.02)                                                      | 0.003   | 0.01 (0, 0.02)                                    | 0.004   |
| <i>Percent monthly patient census with ADRD</i>                 |                                                                   |         |                                                                     |         |                                                   |         |
| Pre-FTT/debility exclusion slope <sup>b</sup>                   | 0.13 (0.13, 0.13)                                                 | <.001   | 0.14 (0.14, 0.14)                                                   | <.001   | NA                                                |         |
| Change during FTT/debility exclusion notice                     | 3.19 (2.96, 3.42)                                                 | <.001   | 3.30 (3.06, 3.53)                                                   | <.001   |                                                   |         |
| Post-FTT/debility exclusion slope <sup>b</sup>                  | 0.14 (0.12, 0.16)                                                 | <.001   | 0.15 (0.13, 0.18)                                                   | <.001   |                                                   |         |
| Change during IMPACT passage                                    | -0.63 (-1.07, -0.19)                                              | 0.005   | -0.61 (-1.05, -0.16)                                                | 0.008   |                                                   |         |
| Change during IMPACT implementation                             | -1.54 (-1.99, -1.09)                                              | <.001   | -1.62 (-2.08, -1.16)                                                | <.001   |                                                   |         |
| Post-IMPACT slope <sup>b</sup>                                  | 0.12 (0.10, 0.14)                                                 | <.001   | 0.19 (0.16, 0.21)                                                   | <.001   |                                                   |         |
| Change during TTP implementation                                | -0.15 (-0.37, 0.07)                                               | 0.184   | 0.03 (-0.19, 0.25)                                                  | 0.81    |                                                   |         |
| Post TTP-slope <sup>b</sup>                                     | 0.02 (0.02, 0.03)                                                 | <.001   | 0.03 (0.02, 0.03)                                                   | <.001   |                                                   |         |
| <i>Percent monthly care days provided to patients with ADRD</i> |                                                                   |         |                                                                     |         |                                                   |         |
| Pre-FTT/debility exclusion slope <sup>b</sup>                   | 0.15 (0.14, 0.15)                                                 | <.001   | 0.16 (0.15, 0.16)                                                   | <.001   | NA                                                |         |
| Change during FTT/debility exclusion notice                     | 3.25 (3.00, 3.51)                                                 | <.001   | 3.36 (3.10, 3.61)                                                   | <.001   |                                                   |         |
| Post-FTT/debility exclusion slope <sup>b</sup>                  | 0.15 (0.12, 0.17)                                                 | <.001   | 0.16 (0.13, 0.19)                                                   | <.001   |                                                   |         |
| Change during IMPACT passage                                    | -0.47 (-0.96, 0.02)                                               | 0.058   | -0.43 (-0.93, 0.06)                                                 | 0.084   |                                                   |         |
| Change during IMPACT implementation                             | -1.47 (-1.96, -0.97)                                              | <.001   | -1.53 (-2.03, -1.02)                                                | <.001   |                                                   |         |
| Post-IMPACT slope <sup>b</sup>                                  | 0.11 (0.09, 0.14)                                                 | <.001   | 0.18 (0.15, 0.20)                                                   | <.001   |                                                   |         |
| Change during TTP implementation                                | -0.21 (-0.45, 0.03)                                               | 0.09    | -0.07 (-0.31, 0.17)                                                 | 0.574   |                                                   |         |
| Post TTP-slope <sup>b</sup>                                     | 0.02 (0.02, 0.03)                                                 | <.001   | 0.03 (0.02, 0.03)                                                   | <.001   |                                                   |         |

Abbreviations: ADRD = Alzheimer’s Disease and Related Dementias; FTT = failure-to-thrive and debility exclusion as a primary hospice diagnosis; NA = not applicable; TTP = two-tier pay  
<sup>a</sup> Adjusted for month indicators, (absorbed) hospice fixed effects + time-varying hospice-level covariates (hospice ownership, total registered nurses, total employees, new enrollee demographic distributions (age, gender, race/ethnicity), percent care days provided at routine home care and continuous home care levels, and percent care days provided in the community/home setting, nonskilled long-term care setting, and skilled nursing home/inpatient setting) + time-varying county-level covariates (population, percent population over age 65 and over age 85, gender and race/ethnicity distribution, number of active physicians, rural-urban setting, percent below poverty level, median household income).

<sup>b</sup> Slope coefficients are direct estimates of the slope during each specified time-period

**eTable 7.** Differences in the trajectories of percent new monthly enrollees with ADRD, percent monthly patient census with ADRD, and percent care days provided to patients with ADRD coinciding with recent policy changes affecting the Medicare hospice benefit, estimated by fully adjusted models<sup>a</sup> using different subsamples of the data

|                                                                 | Excluding government-owned hospices |         | Excluding MA enrollees |         | Subset of hospices in operation between July 2008 and Dec 2019 |         | Limited to data from 2010 and later |         |
|-----------------------------------------------------------------|-------------------------------------|---------|------------------------|---------|----------------------------------------------------------------|---------|-------------------------------------|---------|
|                                                                 | Estimate (95% CI)                   | p-value | Estimate (95% CI)      | p-value | Estimate (95% CI)                                              | p-value | Estimate (95% CI)                   | p-value |
| <i>Percent new monthly enrollees with ADRD</i>                  |                                     |         |                        |         |                                                                |         |                                     |         |
| Pre-FTT/debility exclusion slope <sup>b</sup>                   | 0.05 (0.04, 0.06)                   | <.001   | 0.06 (0.05, 0.06)      | <.001   | 0.05 (0.04, 0.05)                                              | <.001   | 0.06 (0.05, 0.07)                   | <.001   |
| Change during FTT/debility exclusion notice                     | 3.90 (3.52, 4.28)                   | <.001   | 3.93 (3.51, 4.36)      | <.001   | 3.94 (3.56, 4.32)                                              | <.001   | 3.68 (3.29, 4.06)                   | <.001   |
| Post-FTT/debility exclusion slope <sup>b</sup>                  | 0.09 (0.06, 0.13)                   | <.001   | 0.08 (0.03, 0.12)      | <.001   | 0.07 (0.03, 0.11)                                              | <.001   | 0.09 (0.06, 0.13)                   | <.001   |
| Change during IMPACT passage                                    | -1.5 (-2.22, -0.77)                 | <.001   | -1.23 (-2.05, -0.41)   | 0.003   | -1.80 (-2.49, -1.11)                                           | <.001   | -1.44 (-2.16, -0.73)                | <.001   |
| Change during IMPACT implementation                             | -1.97 (-2.71, -1.23)                | <.001   | -2.17 (-3.01, -1.34)   | <.001   | -1.57 (-2.27, -0.86)                                           | <.001   | -1.96 (-2.68, -1.23)                | <.001   |
| Post-IMPACT slope <sup>b</sup>                                  | 0.12 (0.08, 0.15)                   | <.001   | 0.10 (0.06, 0.15)      | <.001   | 0.11 (0.07, 0.14)                                              | <.001   | 0.11 (0.08, 0.15)                   | <.001   |
| Change during TTP implementation                                | 0.14 (-0.22, 0.51)                  | 0.447   | 0.22 (-0.19, 0.64)     | 0.292   | 0.48 (0.12, 0.84)                                              | 0.009   | 0.18 (-0.18, 0.54)                  | 0.334   |
| Post TTP-slope <sup>b</sup>                                     | 0.01 (0.01, 0.02)                   | <.001   | 0.01 (0, 0.02)         | 0.003   | 0.02 (0.01, 0.03)                                              | <.001   | 0.01 (0.01, 0.02)                   | <.001   |
| <i>Percent monthly patient census with ADRD</i>                 |                                     |         |                        |         |                                                                |         |                                     |         |
| Pre-FTT/debility exclusion slope <sup>b</sup>                   | 0.12 (0.12, 0.13)                   | <.001   | 0.12 (0.12, 0.13)      | <.001   | 0.12 (0.11, 0.12)                                              | <.001   | 0.13 (0.12, 0.14)                   | <.001   |
| Change during FTT/debility exclusion notice                     | 3.12 (2.89, 3.34)                   | <.001   | 2.97 (2.72, 3.23)      | <.001   | 3.01 (2.78, 3.24)                                              | <.001   | 2.87 (2.64, 3.1)                    | <.001   |
| Post-FTT/debility exclusion slope <sup>b</sup>                  | 0.13 (0.11, 0.16)                   | <.001   | 0.13 (0.1, 0.16)       | <.001   | 0.09 (0.07, 0.12)                                              | <.001   | 0.13 (0.11, 0.15)                   | <.001   |
| Change during IMPACT passage                                    | -0.69 (-1.13, -0.25)                | 0.002   | -0.42 (-0.92, 0.08)    | 0.102   | -0.8 (-1.24, -0.36)                                            | <.001   | -0.73 (-1.16, -0.3)                 | <.001   |
| Change during IMPACT implementation                             | -1.49 (-1.94, -1.05)                | <.001   | -1.49 (-2.00, -0.97)   | <.001   | -1.57 (-2.02, -1.12)                                           | <.001   | -1.44 (-1.87, -1)                   | <.001   |
| Post-IMPACT slope <sup>b</sup>                                  | 0.05 (0.03, 0.07)                   | <.001   | 0.03 (0.01, 0.06)      | 0.019   | 0.07 (0.05, 0.1)                                               | <.001   | 0.05 (0.03, 0.07)                   | <.001   |
| Change during TTP implementation                                | -0.29 (-0.51, -0.08)                | 0.007   | -0.34 (-0.59, -0.09)   | 0.008   | -0.13 (-0.36, 0.09)                                            | 0.242   | -0.34 (-0.54, -0.13)                | 0.002   |
| Post TTP-slope <sup>b</sup>                                     | 0.03 (0.02, 0.03)                   | <.001   | 0.02 (0.02, 0.03)      | <.001   | 0.02 (0.02, 0.03)                                              | <.001   | 0.03 (0.02, 0.03)                   | <.001   |
| <i>Percent monthly care days provided to patients with ADRD</i> |                                     |         |                        |         |                                                                |         |                                     |         |
| Pre-FTT/debility exclusion slope <sup>b</sup>                   | 0.14 (0.13, 0.14)                   | <.001   | 0.14 (0.13, 0.14)      | <.001   | 0.13 (0.13, 0.14)                                              | <.001   | 0.15 (0.14, 0.16)                   | <.001   |
| Change during FTT/debility exclusion notice                     | 3.22 (2.97, 3.47)                   | <.001   | 3.00 (2.72, 3.28)      | <.001   | 3.14 (2.88, 3.4)                                               | <.001   | 2.89 (2.63, 3.14)                   | <.001   |
| Post-FTT/debility exclusion slope <sup>b</sup>                  | 0.13 (0.11, 0.16)                   | <.001   | 0.14 (0.11, 0.17)      | <.001   | 0.09 (0.06, 0.12)                                              | <.001   | 0.13 (0.11, 0.16)                   | <.001   |
| Change during IMPACT passage                                    | -0.48 (-0.96, 0)                    | 0.05    | -0.27 (-0.82, 0.29)    | 0.349   | -0.62 (-1.12, -0.12)                                           | 0.015   | -0.55 (-1.02, -0.08)                | 0.023   |
| Change during IMPACT implementation                             | -1.43 (-1.92, -0.94)                | <.001   | -1.39 (-1.96, -0.82)   | <.001   | -1.55 (-2.06, -1.04)                                           | <.001   | -1.38 (-1.86, -0.9)                 | <.001   |
| Post-IMPACT slope <sup>b</sup>                                  | 0.03 (0.01, 0.06)                   | 0.007   | 0.02 (-0.01, 0.05)     | 0.274   | 0.07 (0.05, 0.1)                                               | <.001   | 0.04 (0.02, 0.07)                   | <.001   |
| Change during TTP implementation                                | -0.30 (-0.53, -0.07)                | 0.012   | -0.37 (-0.65, -0.1)    | 0.008   | -0.23 (-0.47, 0.02)                                            | 0.074   | -0.38 (-0.61, -0.15)                | 0.001   |
| Post TTP-slope <sup>b</sup>                                     | 0.02 (0.02, 0.03)                   | <.001   | 0.02 (0.02, 0.03)      | <.001   | 0.02 (0.02, 0.03)                                              | <.001   | 0.03 (0.02, 0.03)                   | <.001   |

Abbreviations: ADRD = Alzheimer's Disease and Related Dementias; FTT = failure-to-thrive and debility exclusion as a primary hospice diagnosis; TTP = two-tier pay

<sup>a</sup> Adjusted for month indicators, (absorbed) hospice fixed effects + time-varying hospice-level covariates (hospice ownership, total registered nurses, total employees, new enrollee demographic distributions (age, gender, race/ethnicity), percent care days provided at routine home care and continuous home care levels, and percent care days provided in the community/home setting, nonskilled long-term care setting, and skilled nursing home/inpatient setting) + time-varying county-level covariates (population, percent population over age 65 and over age 85, gender and race/ethnicity distribution, number of active physicians, rural-urban setting, percent below poverty level, median household income).

<sup>b</sup> Slope coefficients are direct estimates of the slope during each specified time-period

**eTable 8.** Differences in the trajectories of percent new monthly enrollees with ADRD, percent monthly patient census with ADRD, and percent care days provided to patients with ADRD coinciding with recent policy changes affecting the Medicare hospice benefit, estimated by fully adjusted models,<sup>a</sup> within hospices with low baseline proportion of institutionalized patients, and hospice with high baseline proportion of institutionalized patients<sup>b</sup>

|                                                                 | Hospices with low baseline proportion of institutionalized patients |         | Hospices with high baseline proportion of institutionalized patients |         |
|-----------------------------------------------------------------|---------------------------------------------------------------------|---------|----------------------------------------------------------------------|---------|
|                                                                 | Estimate (95% CI)                                                   | p-value | Estimate (95% CI)                                                    | p-value |
| <i>Percent new monthly enrollees with ADRD</i>                  |                                                                     |         |                                                                      |         |
| Pre-FTT/debility exclusion slope <sup>c</sup>                   | 0.06 (0.05, 0.08)                                                   | <.001   | 0.04 (0.03, 0.05)                                                    | <.001   |
| Change during FTT/debility exclusion notice                     | 2.84 (2.11, 3.58)                                                   | <.001   | 5.64 (5.06, 6.22)                                                    | <.001   |
| Post-FTT/debility exclusion slope <sup>c</sup>                  | 0.03 (-0.05, 0.1)                                                   | 0.474   | 0.10 (0.04, 0.16)                                                    | <.001   |
| Change during IMPACT passage                                    | -0.24 (-1.6, 1.11)                                                  | 0.725   | -2.24 (-3.29, -1.19)                                                 | <.001   |
| Change during IMPACT implementation                             | -2.52 (-3.9, -1.15)                                                 | <.001   | -1.05 (-2.13, 0.03)                                                  | 0.057   |
| Post-IMPACT slope <sup>c</sup>                                  | 0.10 (0.02, 0.17)                                                   | 0.01    | 0.09 (0.03, 0.14)                                                    | 0.004   |
| Change during TTP implementation                                | -0.17 (-0.86, 0.53)                                                 | 0.64    | 0.54 (-0.01, 1.09)                                                   | 0.055   |
| Post TTP-slope <sup>c</sup>                                     | 0.03 (0.02, 0.05)                                                   | <.001   | 0 (-0.01, 0.02)                                                      | 0.521   |
| <i>Percent monthly patient census with ADRD</i>                 |                                                                     |         |                                                                      |         |
| Pre-FTT/debility exclusion slope <sup>c</sup>                   | 0.12 (0.11, 0.12)                                                   | <.001   | 0.12 (0.11, 0.13)                                                    | <.001   |
| Change during FTT/debility exclusion notice                     | 2.64 (2.21, 3.06)                                                   | <.001   | 4.29 (3.94, 4.63)                                                    | <.001   |
| Post-FTT/debility exclusion slope <sup>c</sup>                  | 0.07 (0.03, 0.11)                                                   | 0.001   | 0.15 (0.12, 0.18)                                                    | <.001   |
| Change during IMPACT passage                                    | -0.74 (-1.54, 0.06)                                                 | 0.07    | -0.94 (-1.59, -0.28)                                                 | 0.005   |
| Change during IMPACT implementation                             | -1.45 (-2.26, -0.63)                                                | <.001   | -1.25 (-1.92, -0.57)                                                 | <.001   |
| Post-IMPACT slope <sup>c</sup>                                  | 0.05 (0.01, 0.09)                                                   | 0.013   | 0.04 (0.01, 0.08)                                                    | 0.016   |
| Change during TTP implementation                                | -0.52 (-0.92, -0.12)                                                | 0.01    | -0.51 (-0.85, -0.18)                                                 | 0.002   |
| Post TTP-slope <sup>c</sup>                                     | 0.05 (0.04, 0.05)                                                   | <.001   | 0 (-0.01, 0.01)                                                      | 0.801   |
| <i>Percent monthly care days provided to patients with ADRD</i> |                                                                     |         |                                                                      |         |
| Pre-FTT/debility exclusion slope <sup>c</sup>                   | 0.13 (0.12, 0.14)                                                   | <.001   | 0.13 (0.13, 0.14)                                                    | <.001   |
| Change during FTT/debility exclusion notice                     | 2.74 (2.26, 3.22)                                                   | <.001   | 4.45 (4.07, 4.82)                                                    | <.001   |
| Post-FTT/debility exclusion slope <sup>c</sup>                  | 0.07 (0.03, 0.12)                                                   | 0.003   | 0.15 (0.11, 0.18)                                                    | <.001   |
| Change during IMPACT passage                                    | -0.80 (-1.68, 0.08)                                                 | 0.073   | -0.65 (-1.36, 0.05)                                                  | 0.07    |
| Change during IMPACT implementation                             | -1.41 (-2.31, -0.52)                                                | 0.002   | -1.24 (-1.97, -0.51)                                                 | <.001   |
| Post-IMPACT slope <sup>c</sup>                                  | 0.05 (0.01, 0.1)                                                    | 0.024   | 0.03 (0, 0.07)                                                       | 0.077   |
| Change during TTP implementation                                | -0.65 (-1.09, -0.2)                                                 | 0.004   | -0.63 (-0.99, -0.27)                                                 | <.001   |
| Post TTP-slope <sup>c</sup>                                     | 0.05 (0.04, 0.06)                                                   | <.001   | -0.01 (-0.01, 0)                                                     | 0.217   |

<sup>b</sup> Baseline period defined as July 2008 – April 2013. Institutionalized patients include all patients who received hospice care in a non-home setting. Hospices with low proportion of institutionalized patients include those that had lower than median percentage (38%) of institutionalized patients in at least 90% of months during the baseline period. Conversely, hospices with high proportion of institutionalized patients include those that had higher than the median percentage (38%) of institutionalized patients in at least 90% of months during the baseline period.

<sup>c</sup> Slope coefficients are direct estimates of the slope during each specified time-period

## **eREFERENCES**

1. Taylor DH, Østbye T, Langa KM, Weir D, Plassman BL. The Accuracy of Medicare Claims as an Epidemiological Tool: The Case of Dementia Revisited. *J Alzheimer's Dis.* 2009;17(4):807-815.
